# Supplementary material
Source: PubMed Central journal article supplement (PMC9280850)
Supplement: NIHMS1822050-supplement-Supporting.pdf [file NIHMS1822050-supplement-Supporting.pdf]

## Supporting Information

# Exploring the Conformational and Binding Dynamics of HMGA2•DNA Complexes Using Trapped Ion Mobility Spectrometry – Mass Spectrometry

Kevin Jeanne Dit Fouque,<sup>1</sup> Sarah N. Sipe,<sup>2</sup> Alyssa Garabedian,<sup>1</sup> German Mejia,<sup>1</sup> Linjia Su,<sup>1</sup> Md Lokman Hossen,<sup>3</sup> Prem P. Chapagain,<sup>3,4</sup> Fenfei Leng,<sup>1,4</sup> Jennifer S. Brodbelt,<sup>2</sup> and Francisco Fernandez-Lima<sup>1,4\*</sup>

<sup>1</sup> Department of Chemistry and Biochemistry, Florida International University, Miami, FL 33199, United States.

<sup>2</sup> Department of Chemistry, University of Texas, Austin, TX 78712 United States.

<sup>3</sup> Department of Physics, Florida International University, Miami, FL 33199, United States.

<sup>4</sup> Biomolecular Sciences Institute, Florida International University, Miami, FL 33199, United States.

Corresponding Author

[fernandf@fiu.edu](mailto:fernandf@fiu.edu)

Table of Contents:

**Figure S1.** TIMS-MS instrument showing the convex electrode TIMS geometry and TIMS operation.

**Figure S2.** TIMS profiles as a function of the collision activation for the multiply protonated species of the free HMGA2 protein.

**Figure S3.** Typical native nESI MS profile of the HMGA2•DNA<sub>22</sub> complexes with 1:3 excess DNA<sub>22</sub> in solution.

**Figure S4.** TIMS profiles as a function of the collision activation for the multiply protonated species of the HMGA2•DNA<sub>22</sub> and HMGA2•DNA<sub>22</sub>•HOE complexes.

**Figure S5.** TIMS profiles as a function of the collision activation for the multiply protonated species of the HMGA2•DNA<sub>50</sub> and HMGA2•DNA<sub>50</sub>•HOE complexes.

# Trapped Ion Mobility Spectrometry (TIMS)

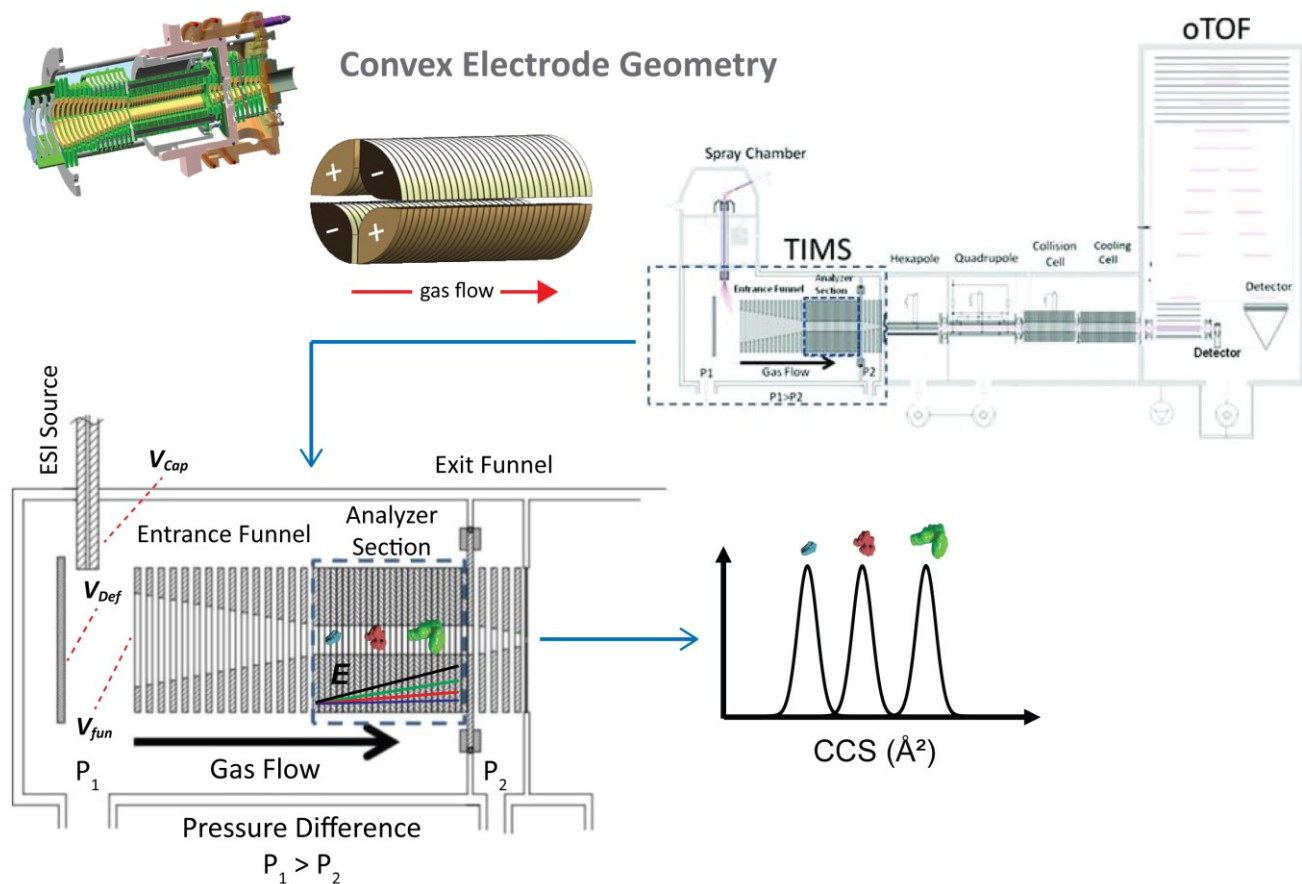

**Figure S1.** TIMS-MS instrument showing the convex electrode TIMS geometry and TIMS operation.

### Collisional Activation ( $\Delta V$ )

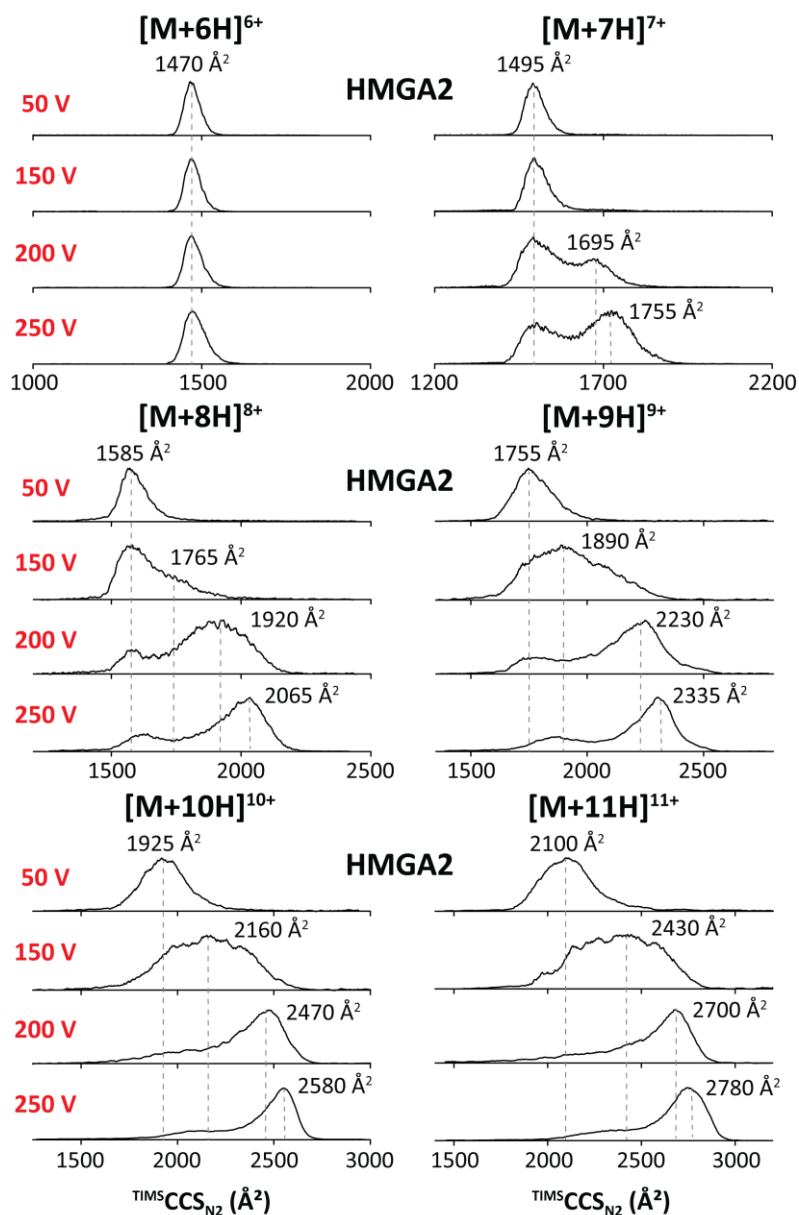

**Figure S2.** TMS profiles as a function of the collisional activation for the multiply protonated species of the free HMGA<sub>2</sub> protein (black traces).

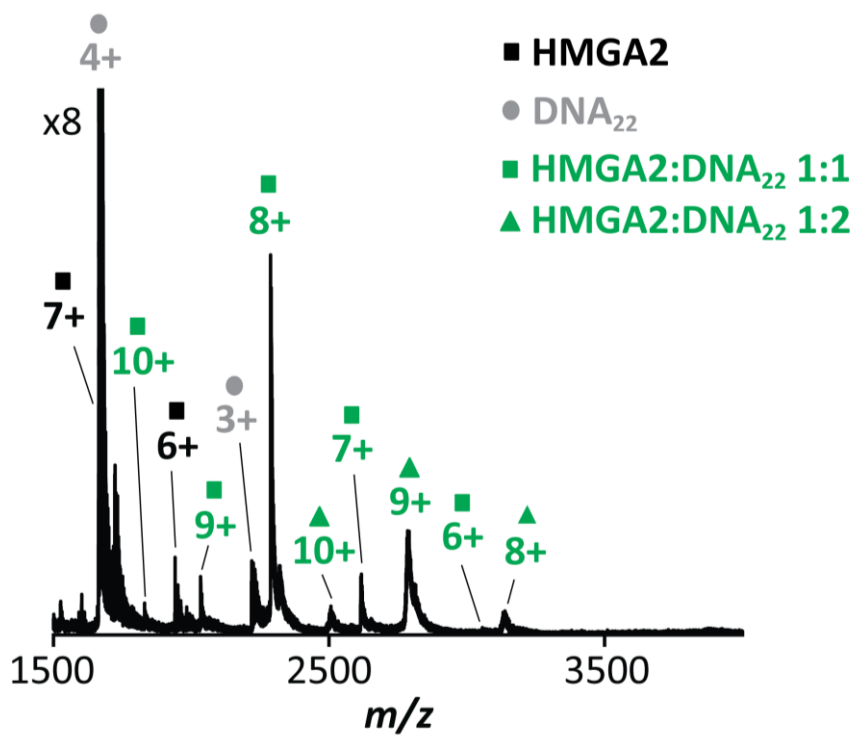

**Figure S3.** Typical native nESI MS profile of the HMGA<sub>2</sub>·DNA<sub>22</sub> complexes with 1:3 excess DNA<sub>22</sub> in solution. Notice the absence of the 1:3 stoichiometry when DNA is in excess.

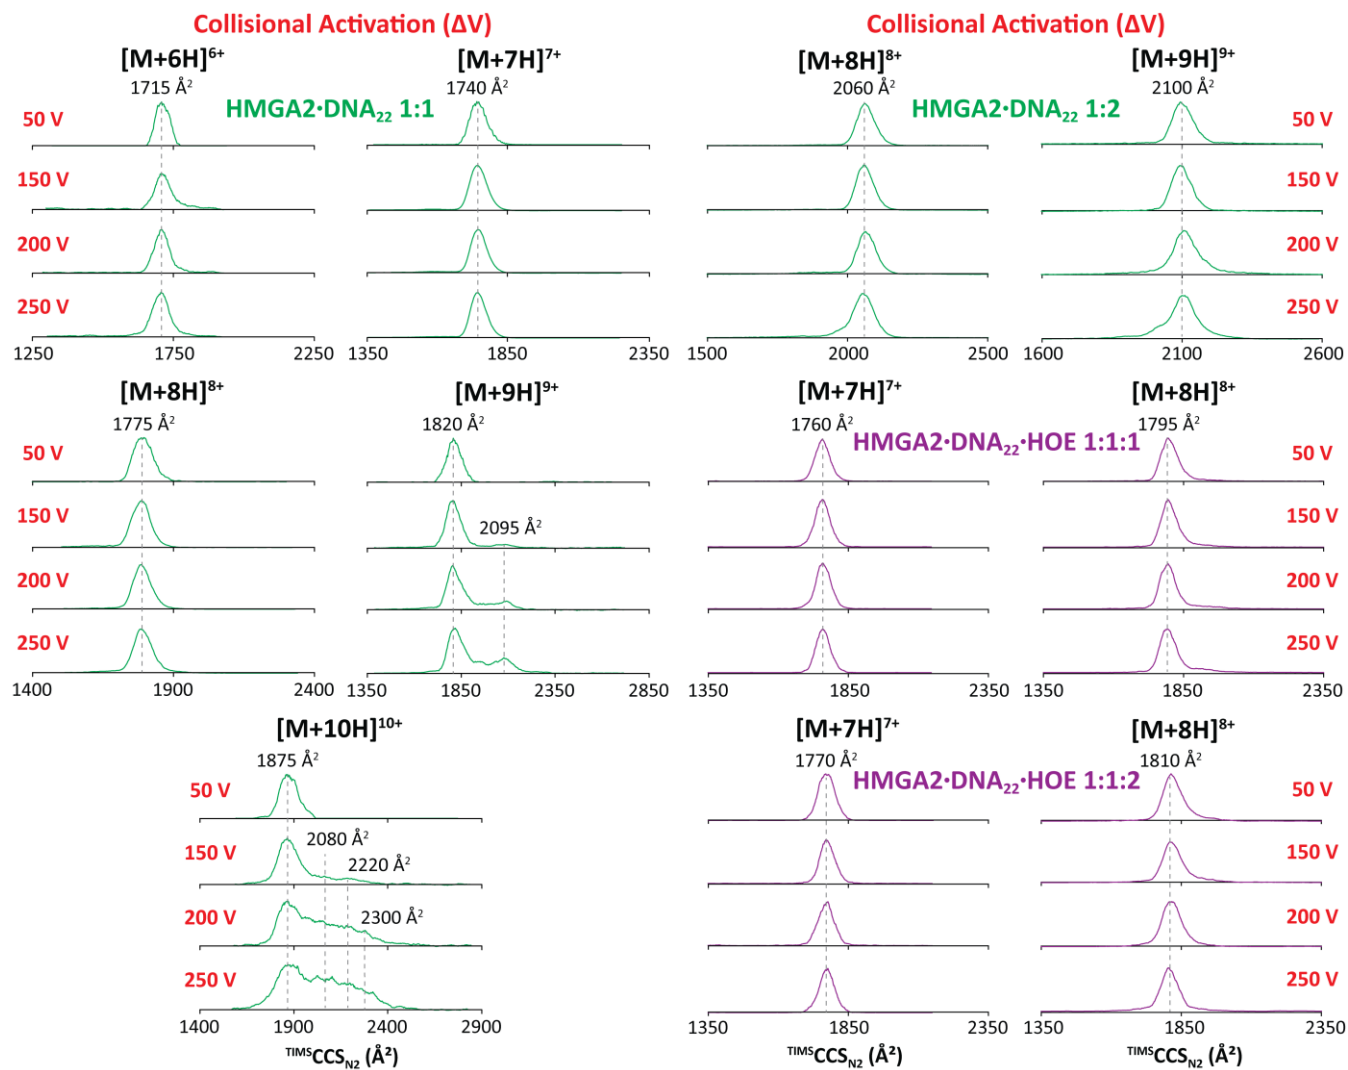

**Figure S4.** TMS profiles as a function of the collision activation for the multiply protonated species of the HMGA2•DNA<sub>22</sub> (green traces) and HMGA2•DNA<sub>22</sub>•HOE (purple traces) complexes.

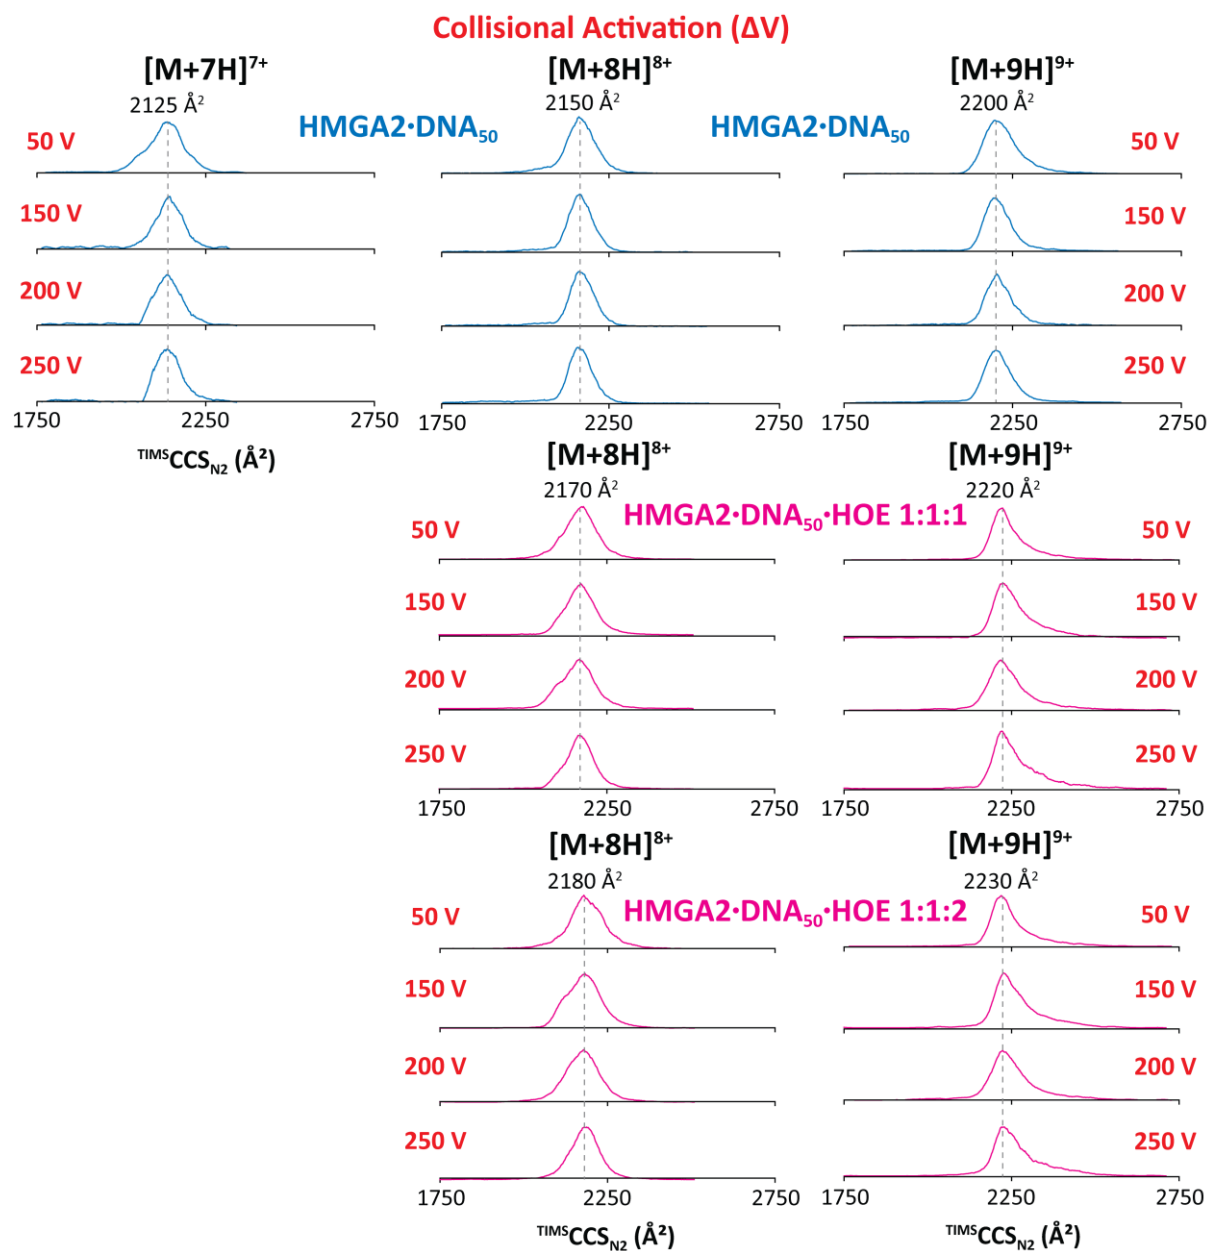

**Figure S5.** TMS profiles as a function of the collisional activation for the multiply protonated species of the HMGA2·DNA<sub>50</sub> (blue traces) and HMGA2·DNA<sub>50</sub>·HOE (magenta traces) complexes.
